# Supplementary material
Source: PubMed Central journal article supplement (PMC4684712)
Supplement: NIHMS735558-supplement-2.pdf [file NIHMS735558-supplement-2.pdf]

## Compound Data Sheet

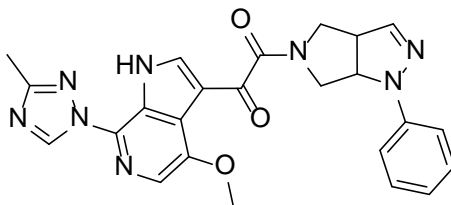

Molecular Weight: 470.48

### DREX-012-SC12

#### Compound Information

|             |                  |
|-------------|------------------|
| Batch:      | ASG CC-3181      |
| Salt:       | None             |
| Amount:     | 34 mg            |
| Appearance: | Pale green solid |

#### Standard QC Analytical Report

|                                                                                        |                                                   |
|----------------------------------------------------------------------------------------|---------------------------------------------------|
| Purity:                                                                                | 97.07% (310 nm, as mixture of conformers) by HPLC |
| <sup>1</sup> H NMR:                                                                    | See attached spectra                              |
| For C <sub>24</sub> H <sub>23</sub> N <sub>8</sub> O <sub>3</sub> (M+H <sup>+</sup> ): | MS (ES+)                                          |
|                                                                                        | Calculated: 471.19                                |
|                                                                                        | Found: 471.2                                      |

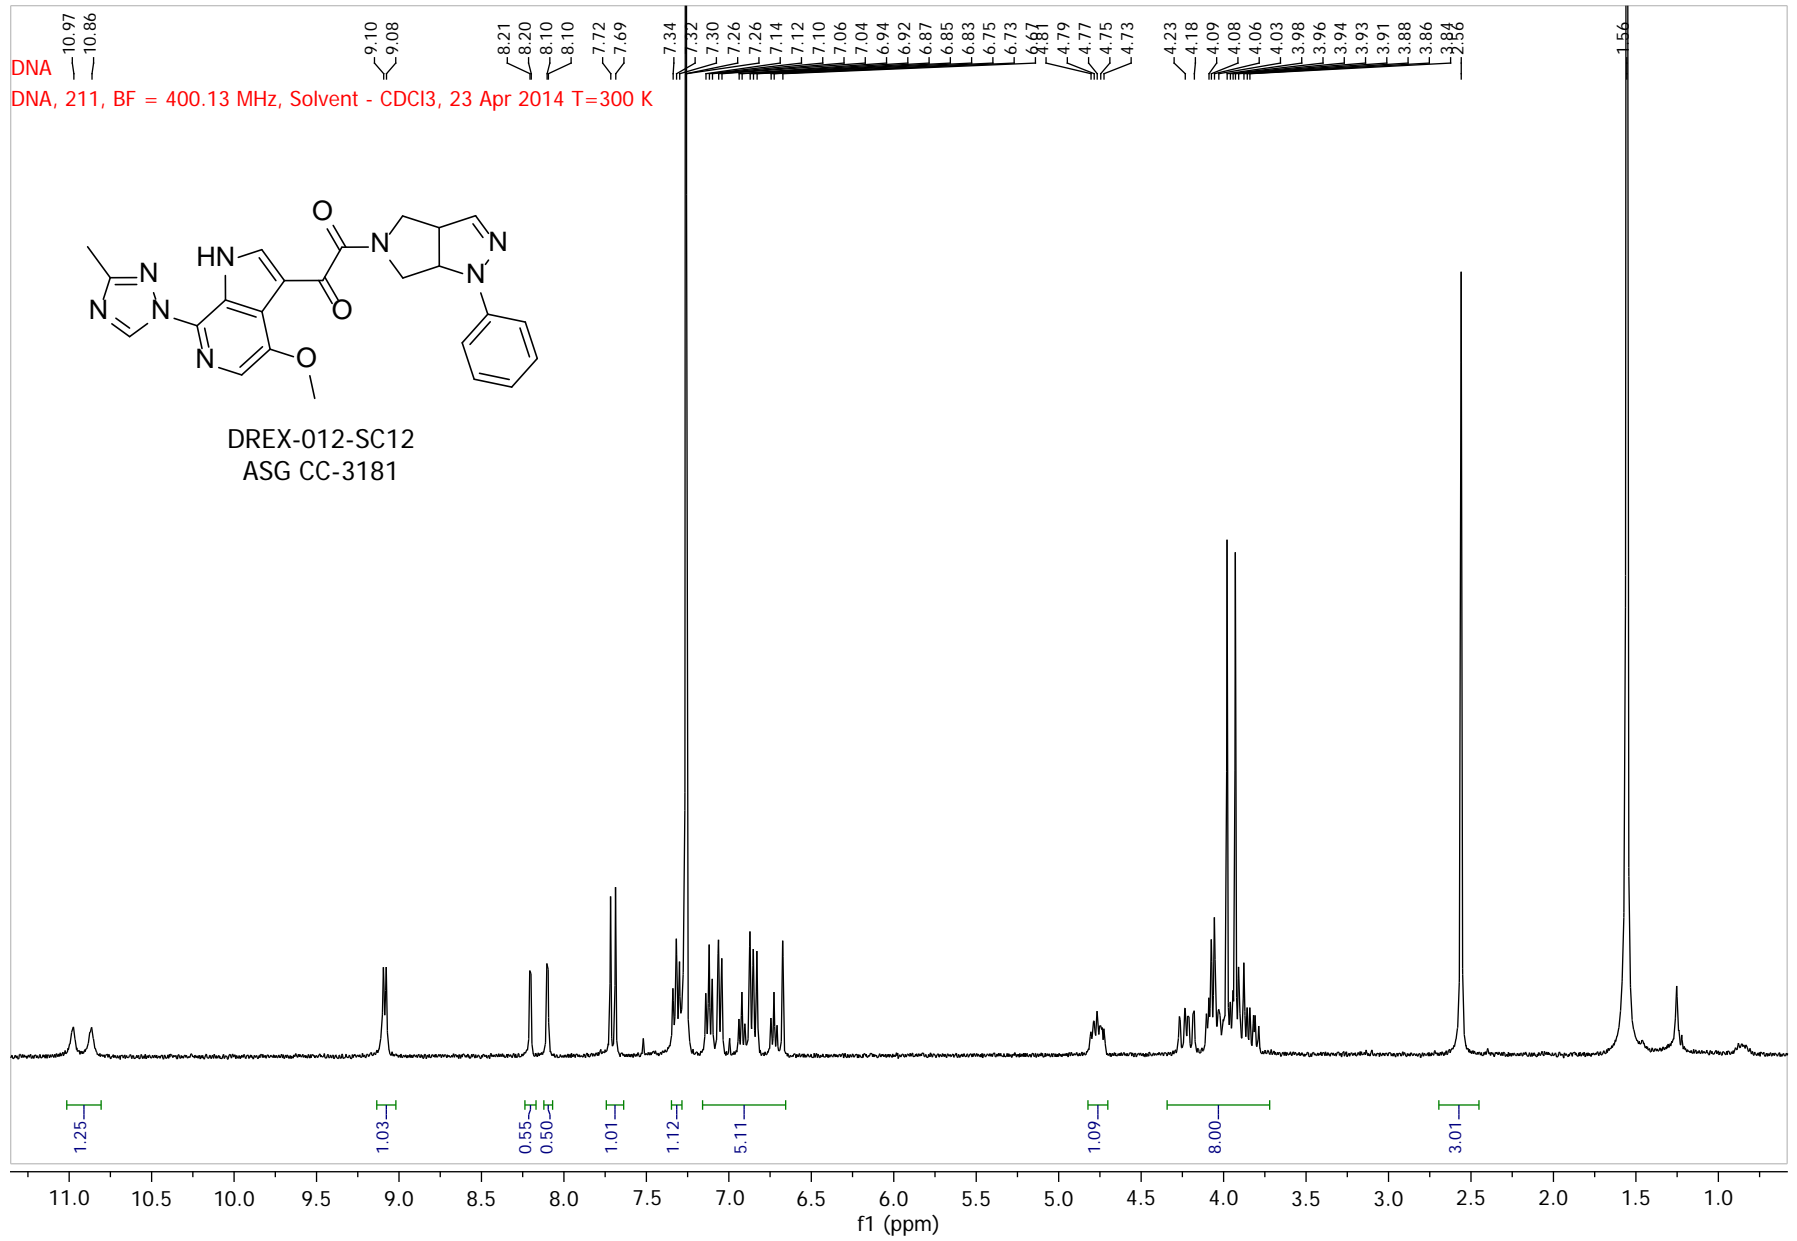

# LCMS DREX-012-SC12

PharmaVam  
DREX-012-SC12\_CC3181\_92

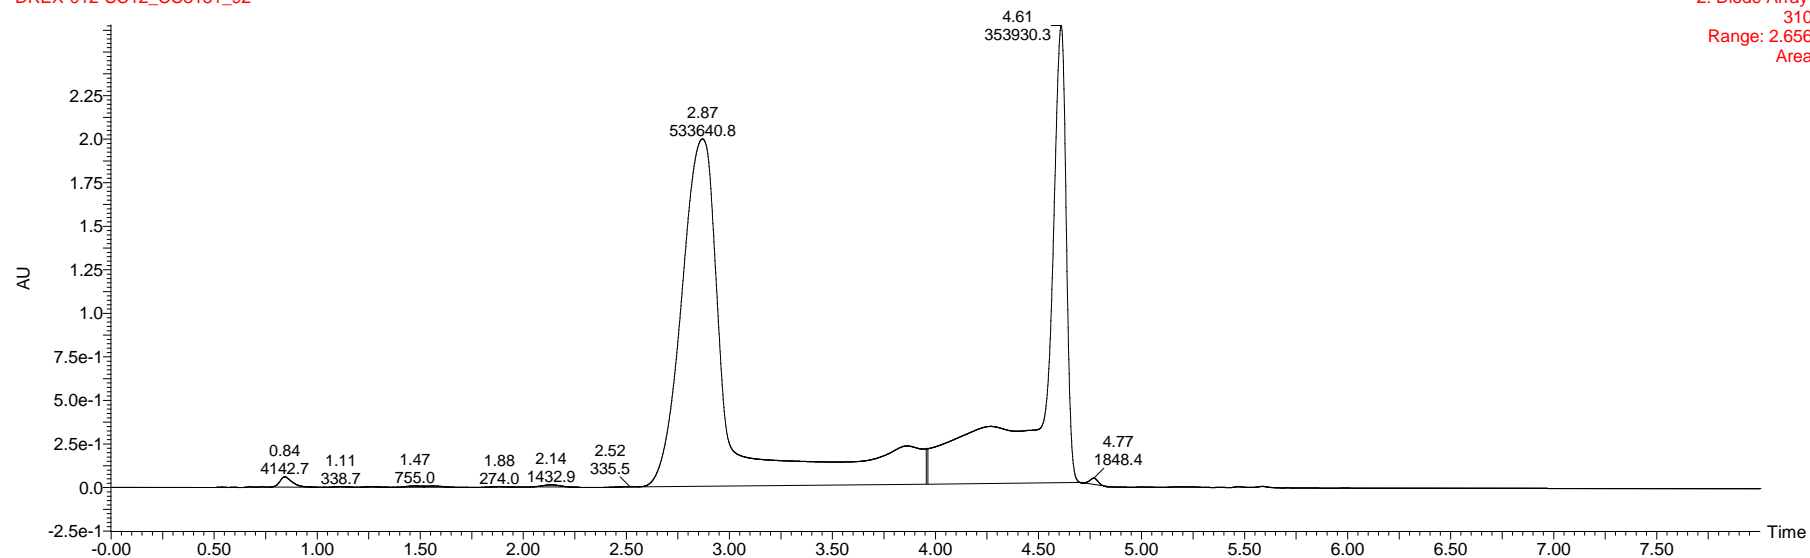

PharmaVam  
DREX-012-SC12\_CC3181\_92

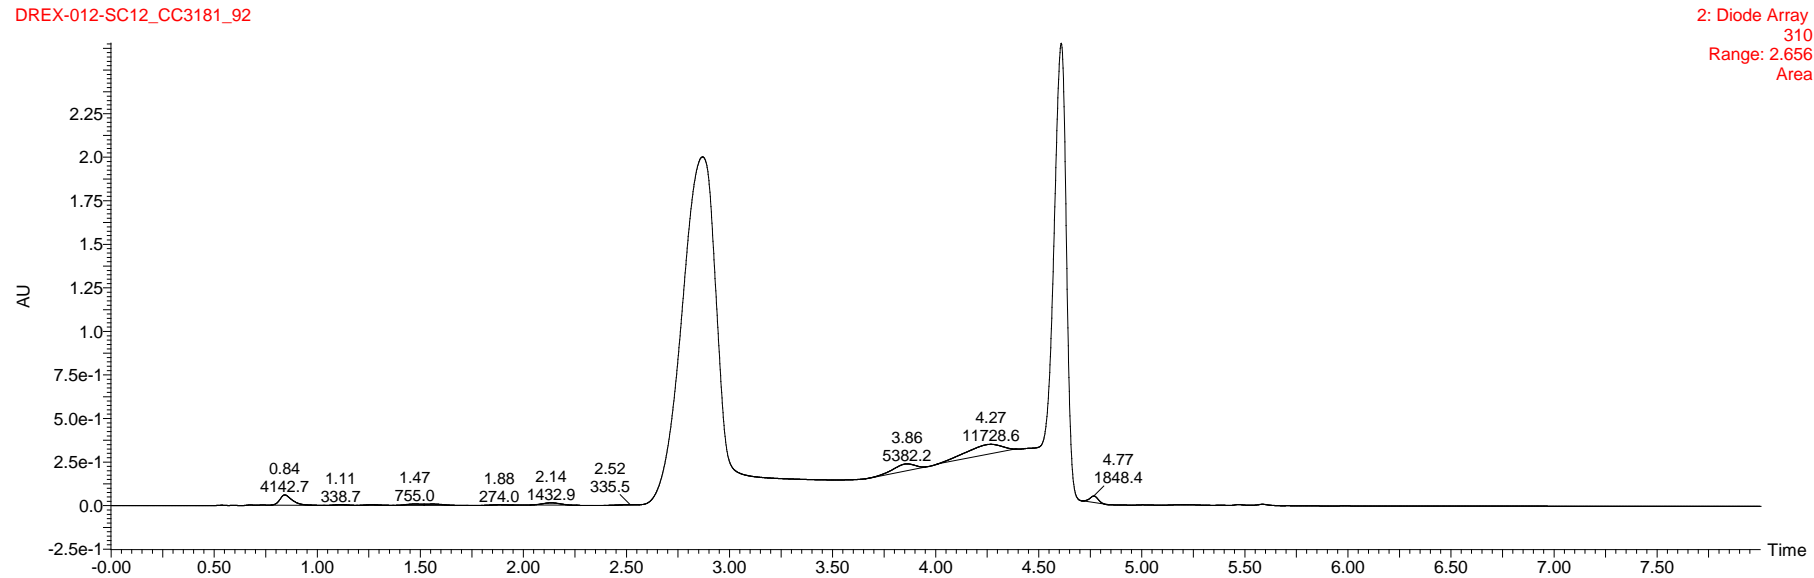

# LCMS DREX-012-SC12

PharmaVam

DREX-012-SC12\_CC3181\_92 173 (2.914)

1: MS2 ES+  
4.29e7

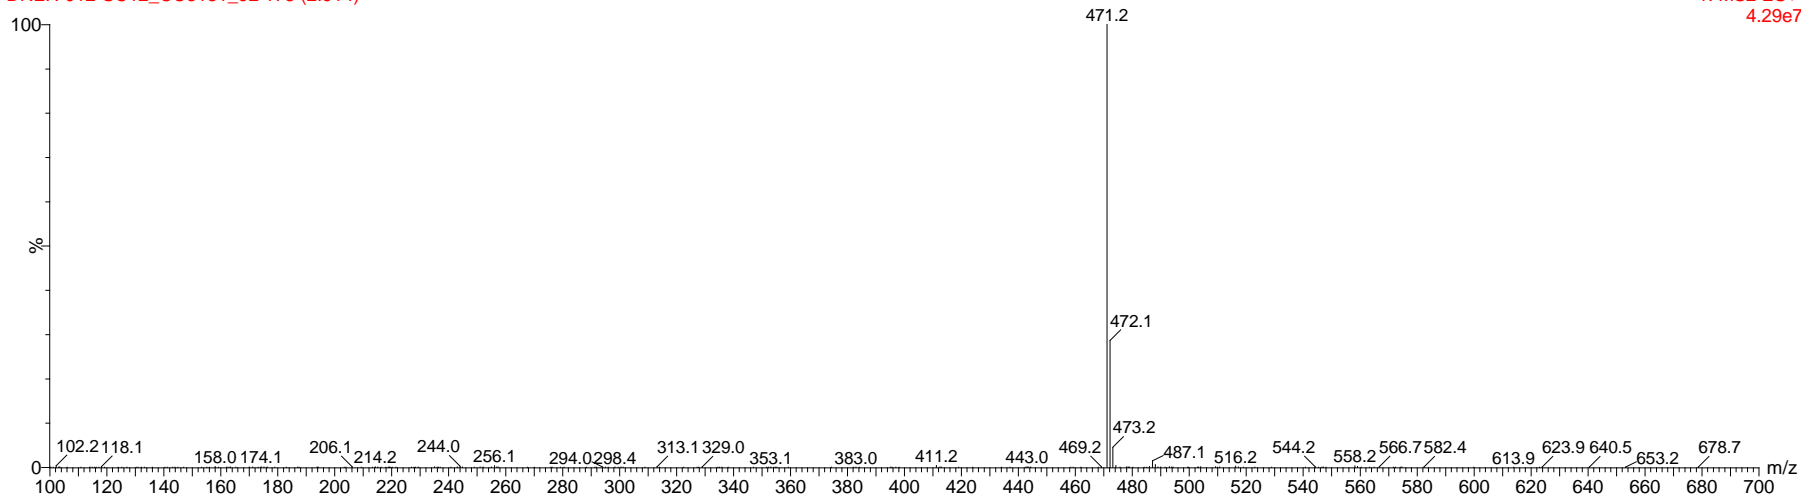

PharmaVam

DREX-012-SC12\_CC3181\_92 276 (4.649)

1: MS2 ES+  
3.61e7

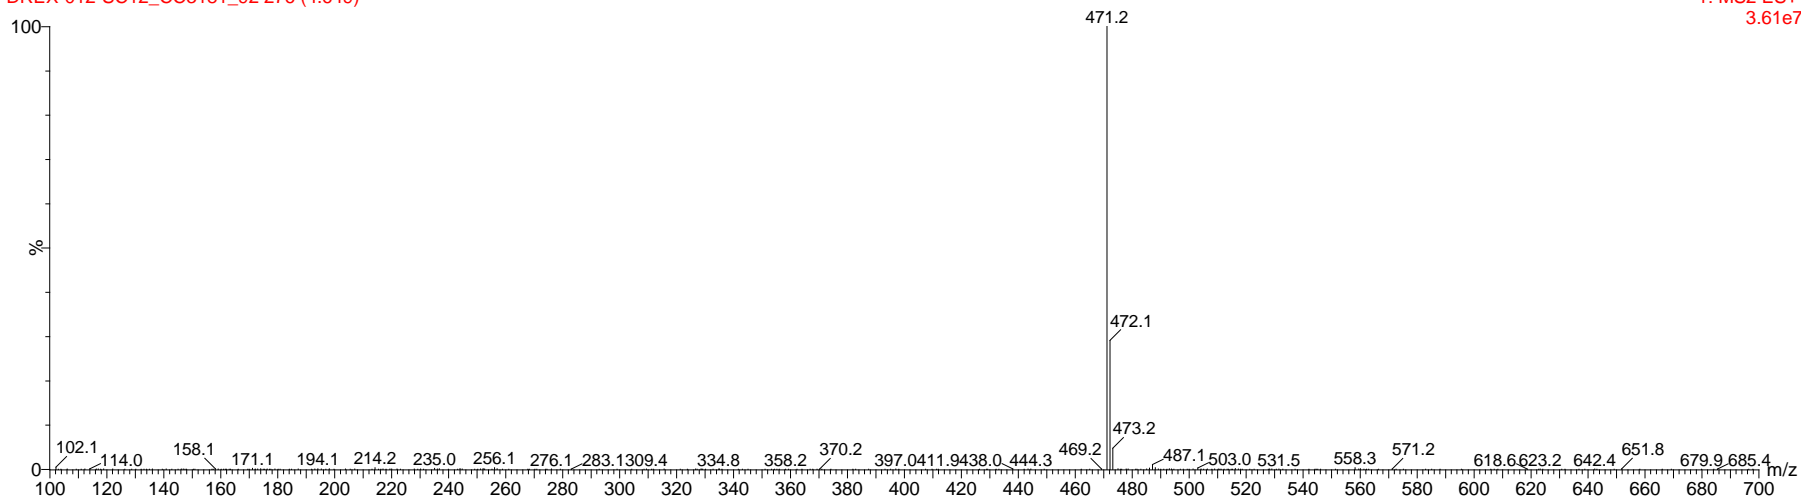

QP-130718-SC14\_001 MW:473.5

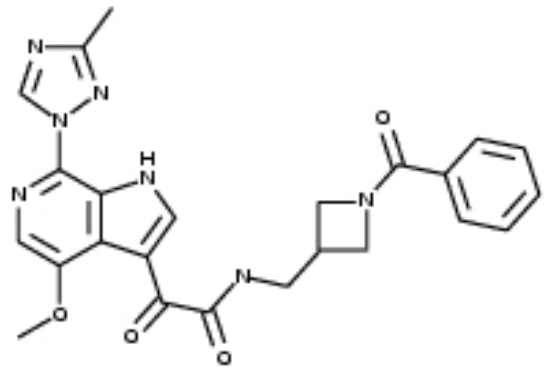

=====  
Injection Date : Sun, 29. Sep. 2013  
Acq Operator : 005654  
Location : P1-A-01  
Inj. Vol. : 2ul  
Acq Method : E:\DATA\130929-WG\WUXIAB01.M  
Data Filename : E:\DATA\130929-WG\WGIT1AA1.D  
LCMS-W

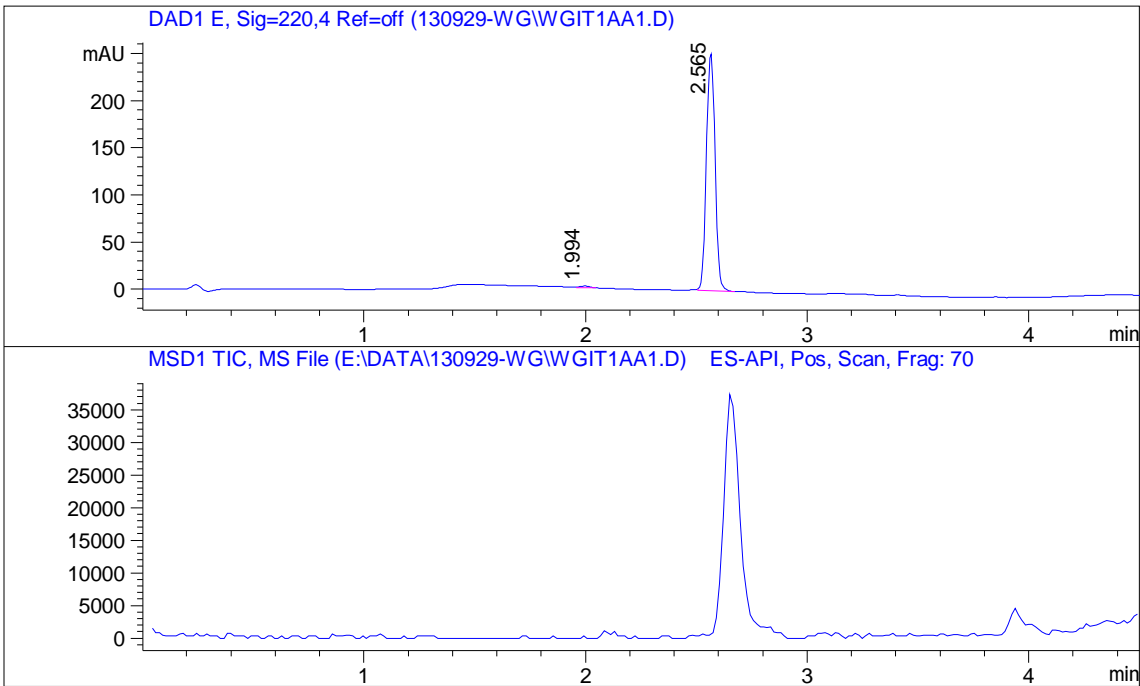

=====  
Report

=====  
Signal 1 : DAD1 E, Sig=220,4 Ref=off

| Peak # | RT [min] | Area    | Height  | Height % | Width [min] | Area % |
|--------|----------|---------|---------|----------|-------------|--------|
| 1      | 1.994    | 4.851   | 1.679   | 0.661    | 0.048       | 0.694  |
| 2      | 2.565    | 693.843 | 252.420 | 99.339   | 0.044       | 99.306 |

-----

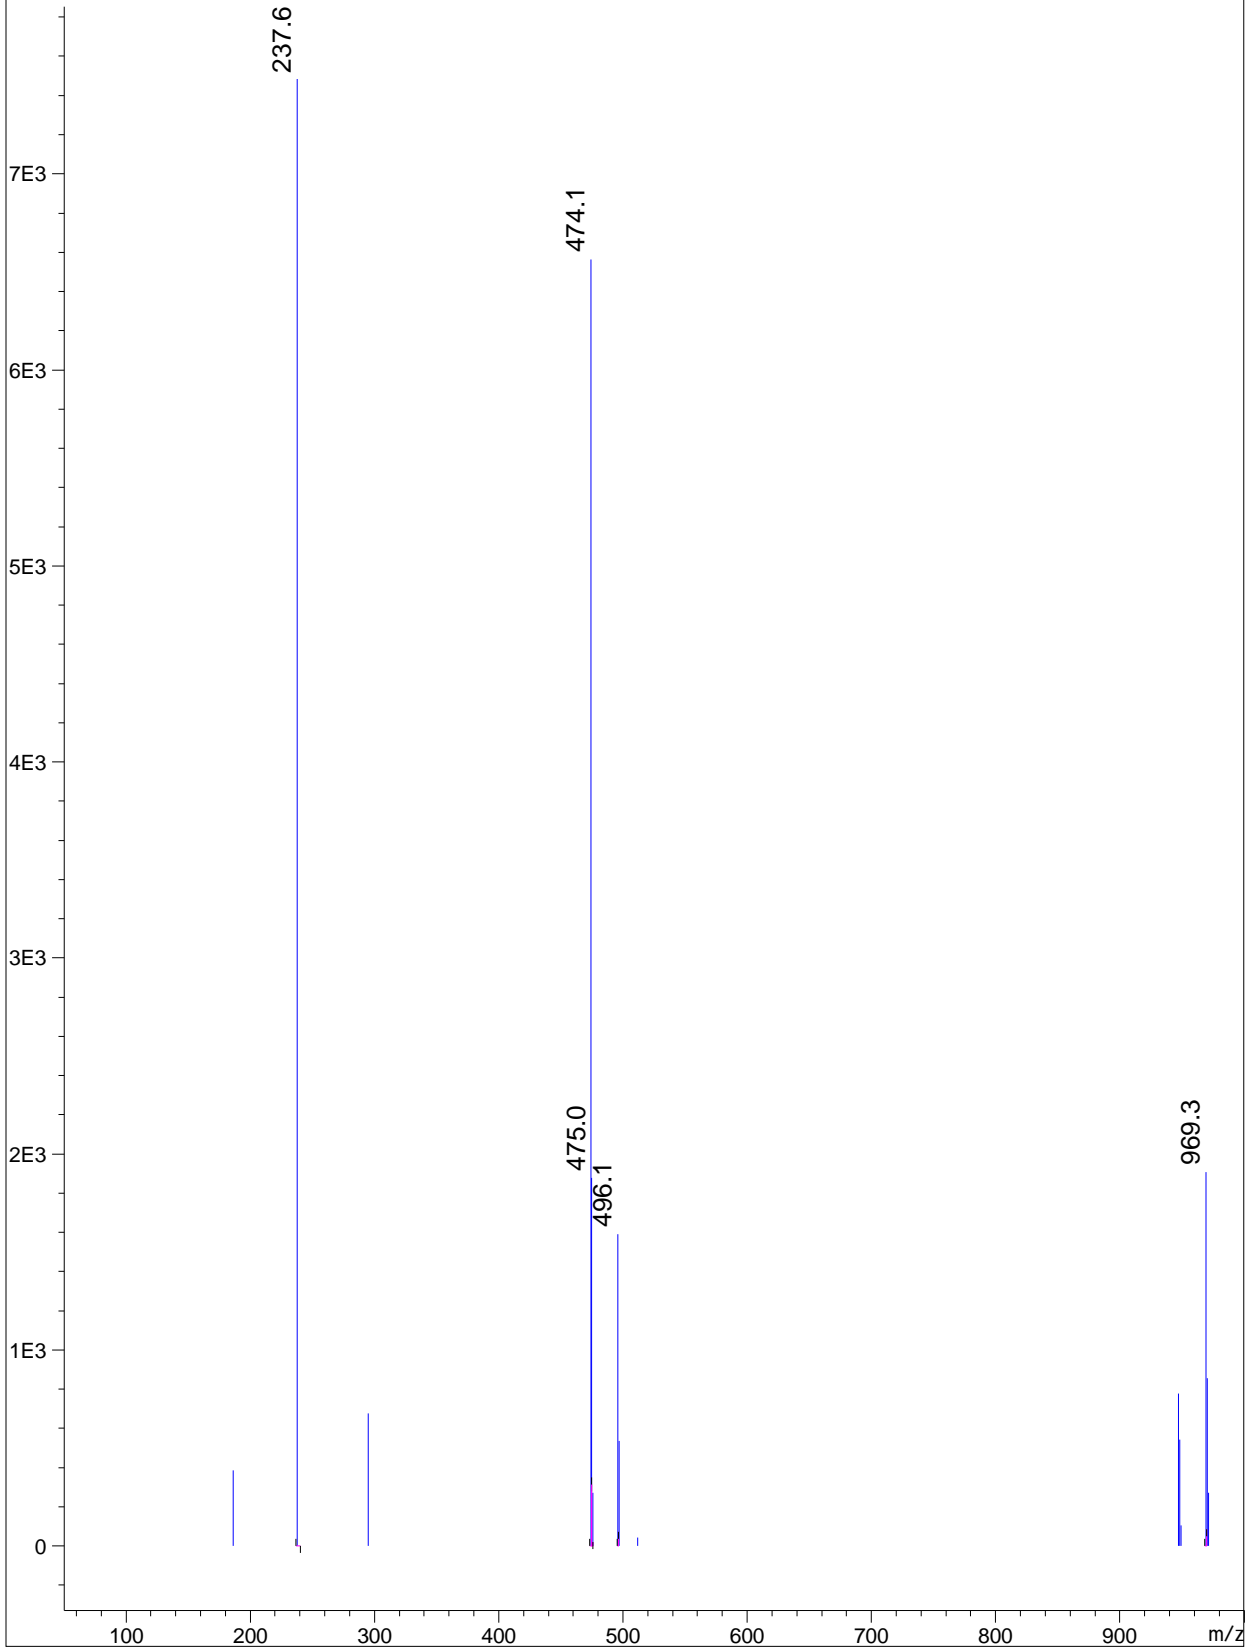

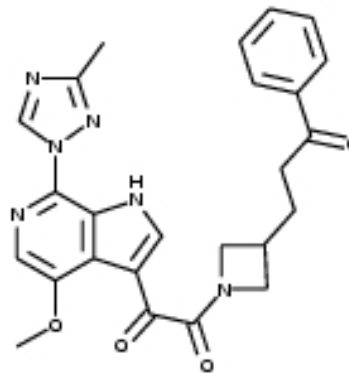

QP-130718-SC15\_001 MW:472.5

```

=====
Injection Date   : Sun, 29. Sep. 2013
Acq Operator    : 005654
Location        : P1-A-03
Inj. Vol.       : 2ul
Acq Method      : E:\DATA\130929-WG4\WUXIAB01.M
Data Filename   : E:\DATA\130929-WG4\WG4IT1AC2.D
LCMS-W
  
```

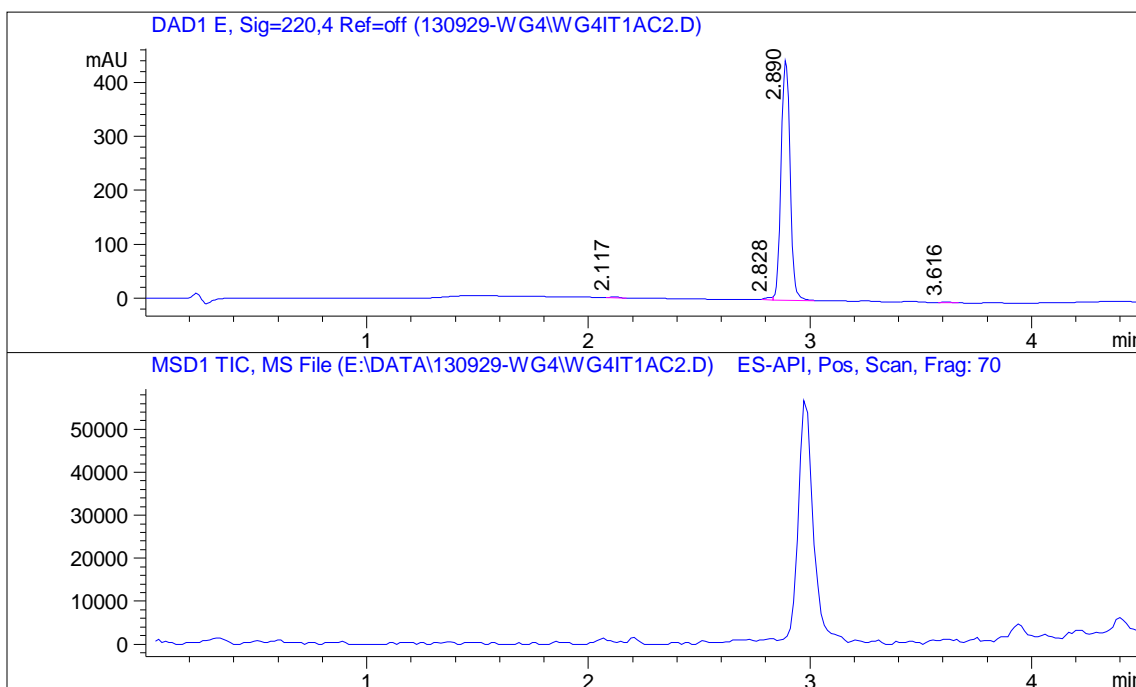

Report

```

=====
Signal 1 : DAD1 E, Sig=220,4 Ref=off
Peak  RT      Area   Height  Height %  Width  Area %
#     [min]
-----
1     2.117     5.432    2.165    0.474     0.042   0.425
2     2.828    11.619    4.801    1.052     0.040   0.909
3     2.890  1254.969  447.359  97.990    0.047  98.147
4     3.616     6.641    2.208    0.484     0.050   0.519
-----
  
```

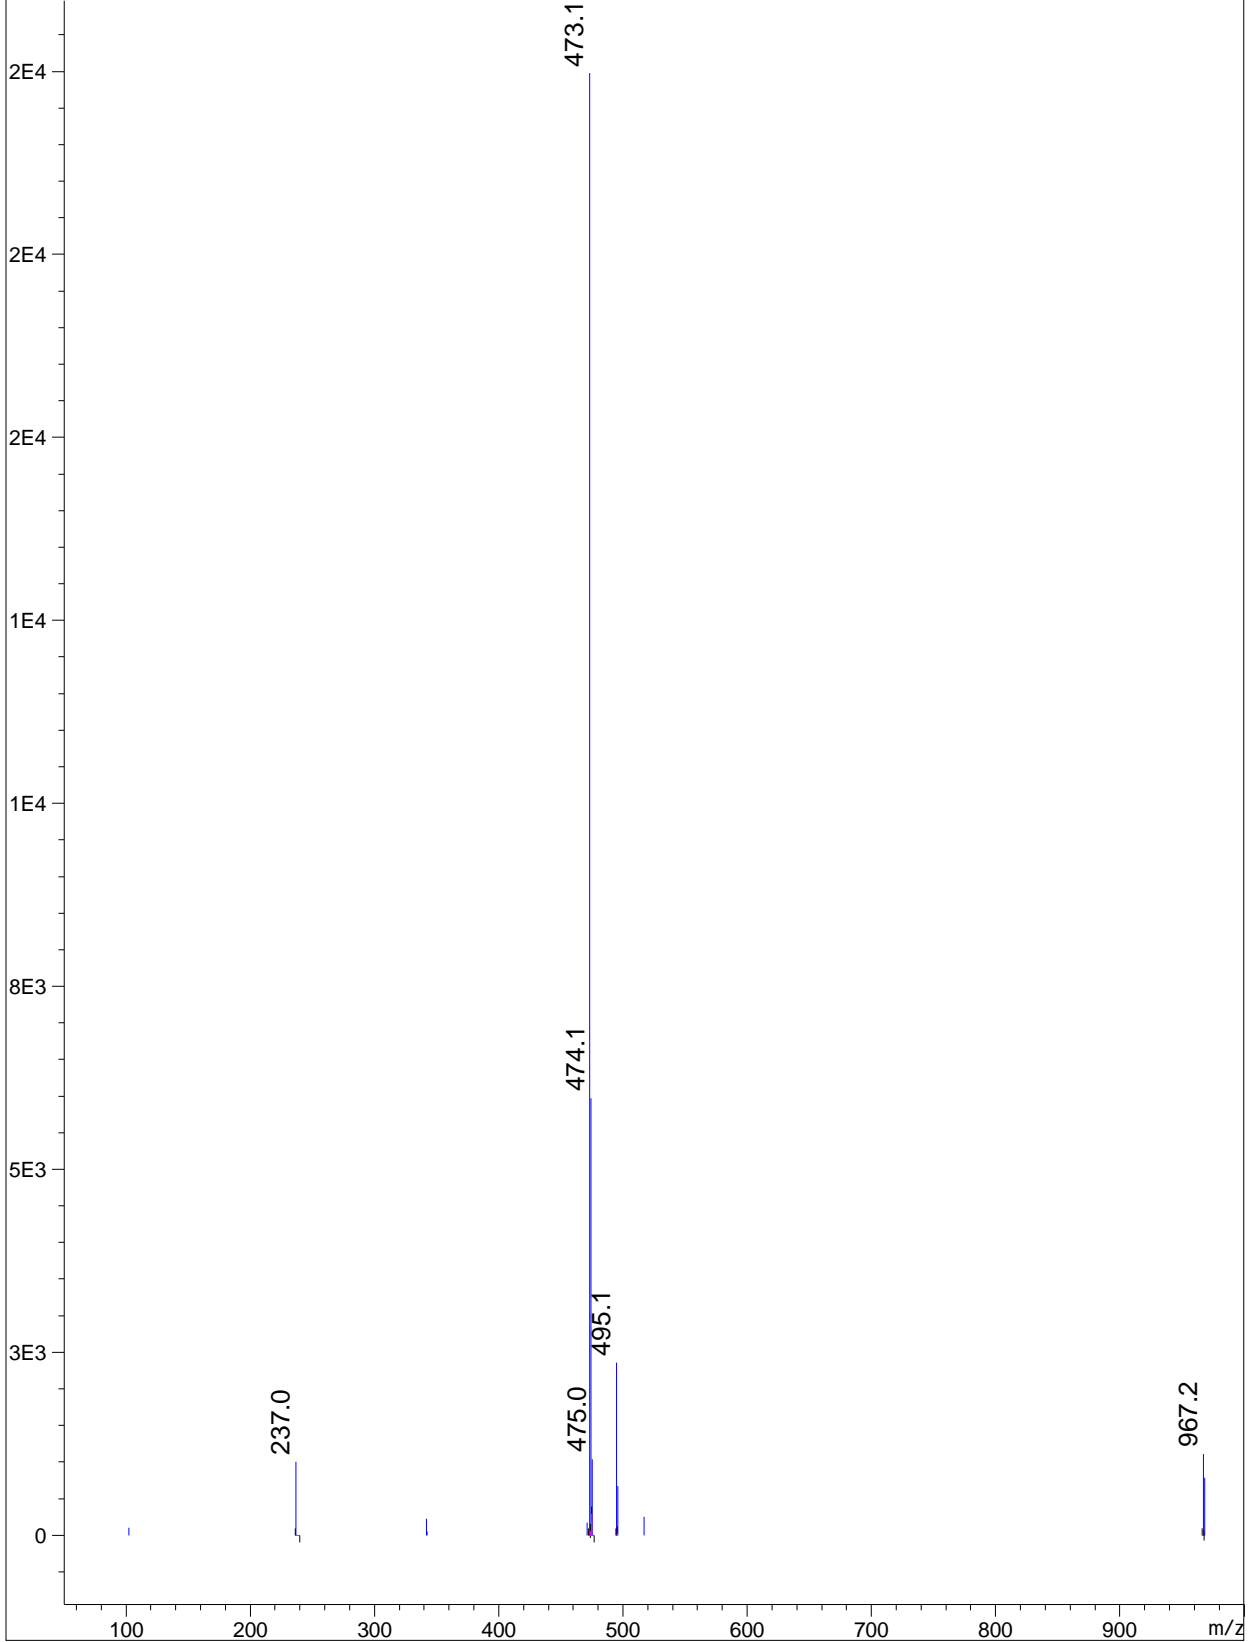



QP-140126-SC27\_001 MW:527.6

=====  
Injection Date : Tue, 30. Sep. 2014  
Acq Operator : 005654  
Location : P1-A-03  
Inj. Vol. : 2ul  
Acq Method : D:\DATA\140930-HG\WUXIAB01\_W.M  
Data Filename : D:\DATA\140930-HG\HGIU1AC1.D  
LCMS-H

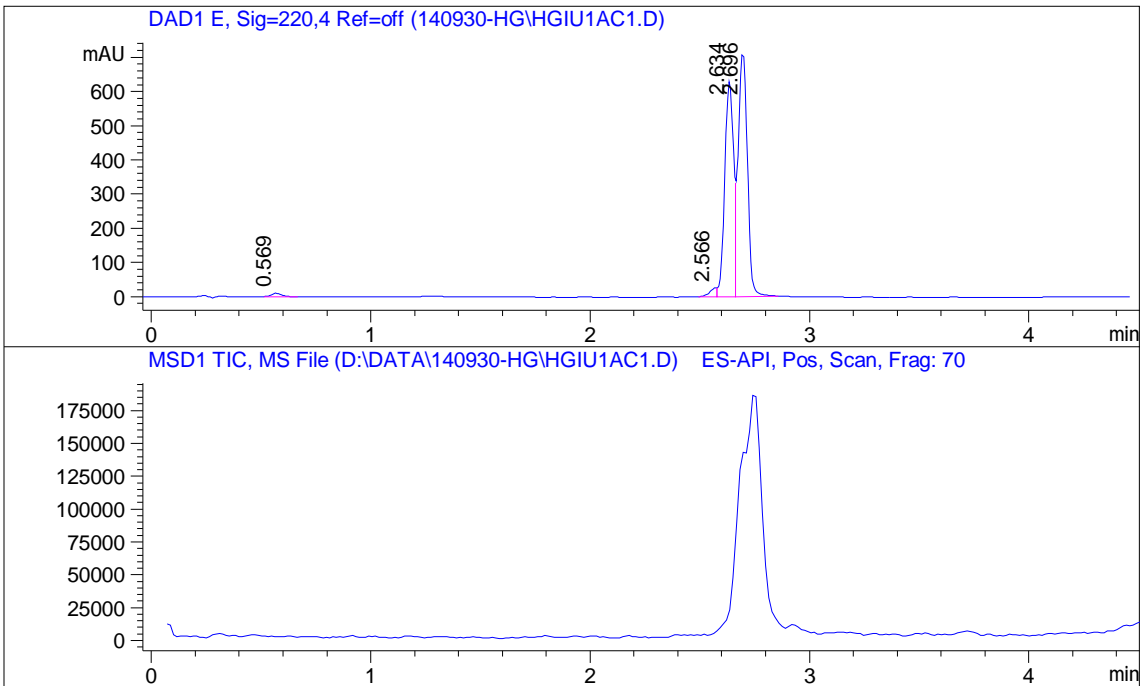

=====  
Report

Signal 1 : DAD1 E, Sig=220,4 Ref=off

| Peak # | RT [min] | Area     | Height  | Height % | Width [min] | Area % |
|--------|----------|----------|---------|----------|-------------|--------|
| 1      | 0.569    | 31.208   | 9.704   | 0.705    | 0.052       | 0.793  |
| 2      | 2.566    | 60.101   | 25.429  | 1.846    | 0.036       | 1.527  |
| 3      | 2.634    | 1762.020 | 629.012 | 45.672   | 0.043       | 44.770 |
| 4      | 2.696    | 2082.347 | 713.096 | 51.777   | 0.046       | 52.910 |

-----

MS Spectrum

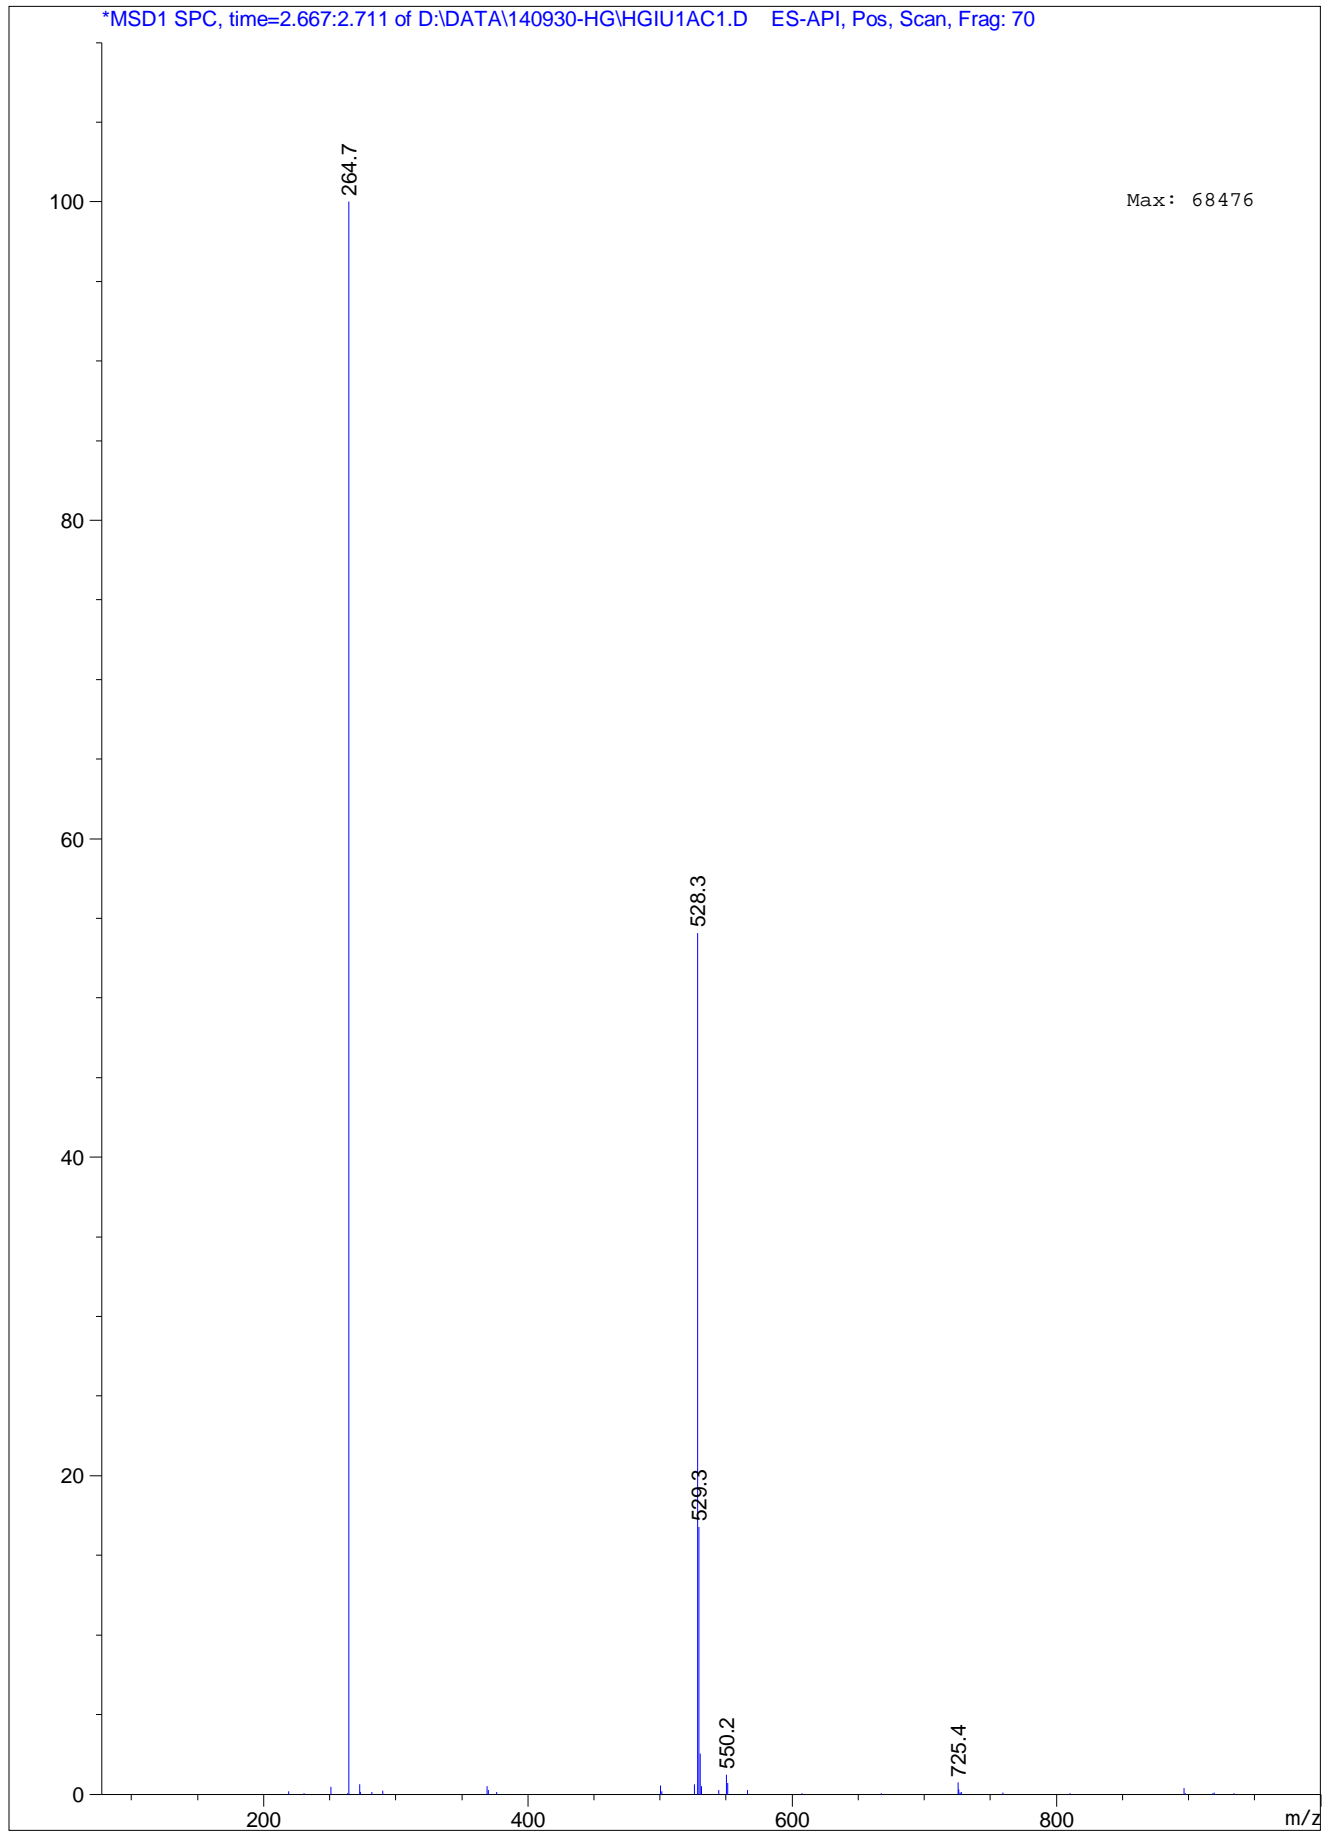

MS Spectrum

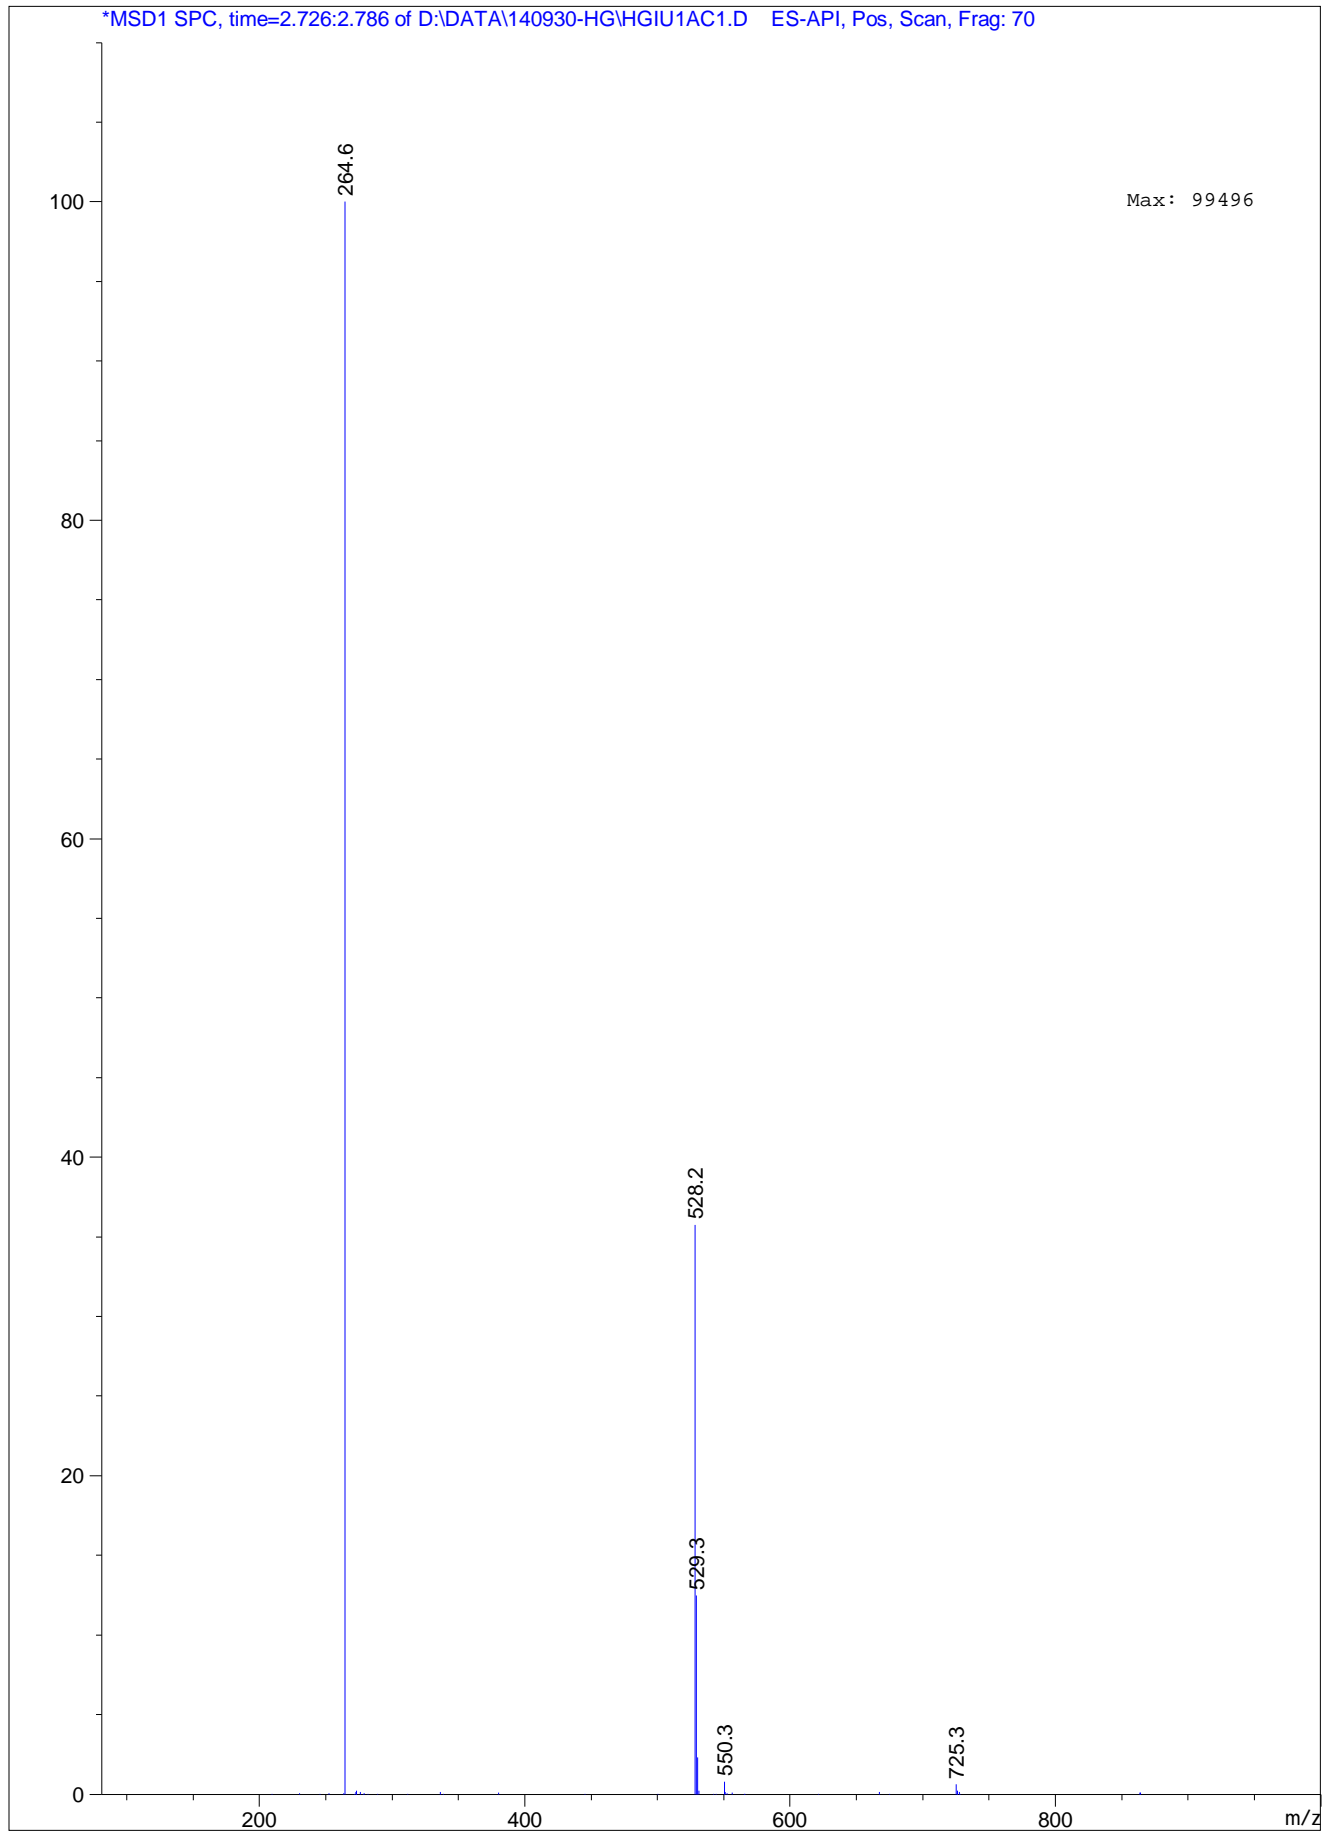

QP-140126-SC28\_001 MW:485.5

=====  
Injection Date : Sun, 28. Sep. 2014  
Acq Operator : 003097  
Location : P1-A-02  
Inj. Vol. : 2ul  
Acq Method : D:\DATA\140928-BG\WUXIAB01\_W.M  
Data Filename : D:\DATA\140928-BG\BGIS1AB1.D  
LCMS-B

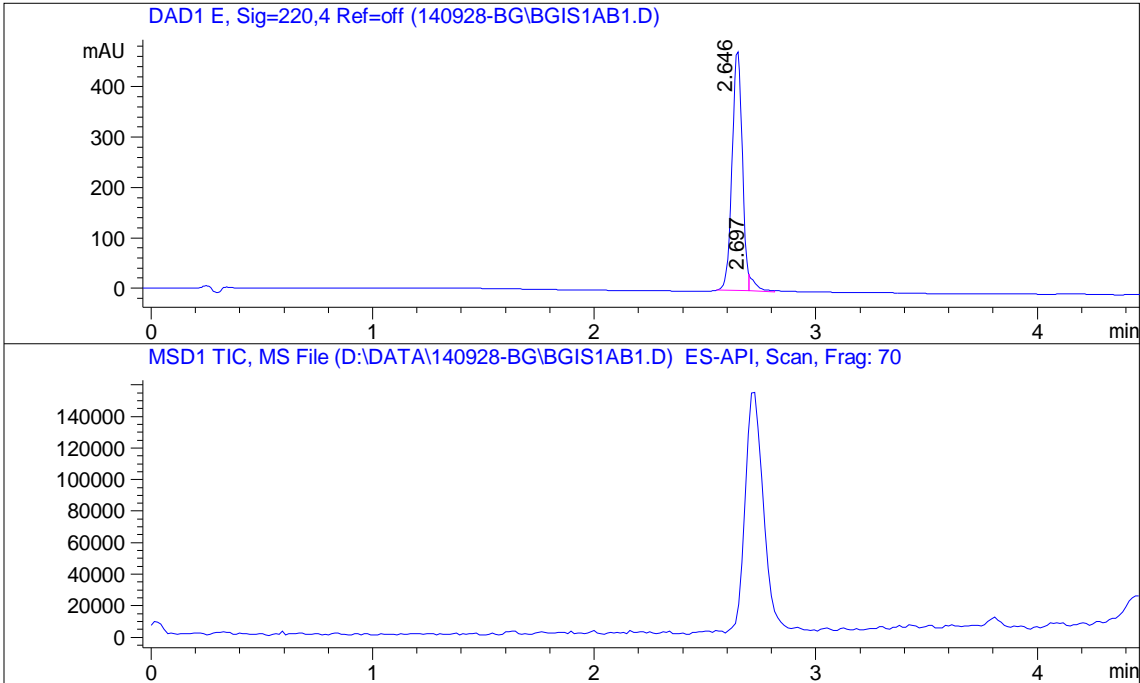

=====  
Report

Signal 1 : DAD1 E, Sig=220,4 Ref=off

| Peak # | RT [min] | Area     | Height  | Height % | Width [min] | Area % |
|--------|----------|----------|---------|----------|-------------|--------|
| 1      | 2.646    | 1515.044 | 478.993 | 93.933   | 0.053       | 96.040 |
| 2      | 2.697    | 62.469   | 30.938  | 6.067    | 0.034       | 3.960  |

-----

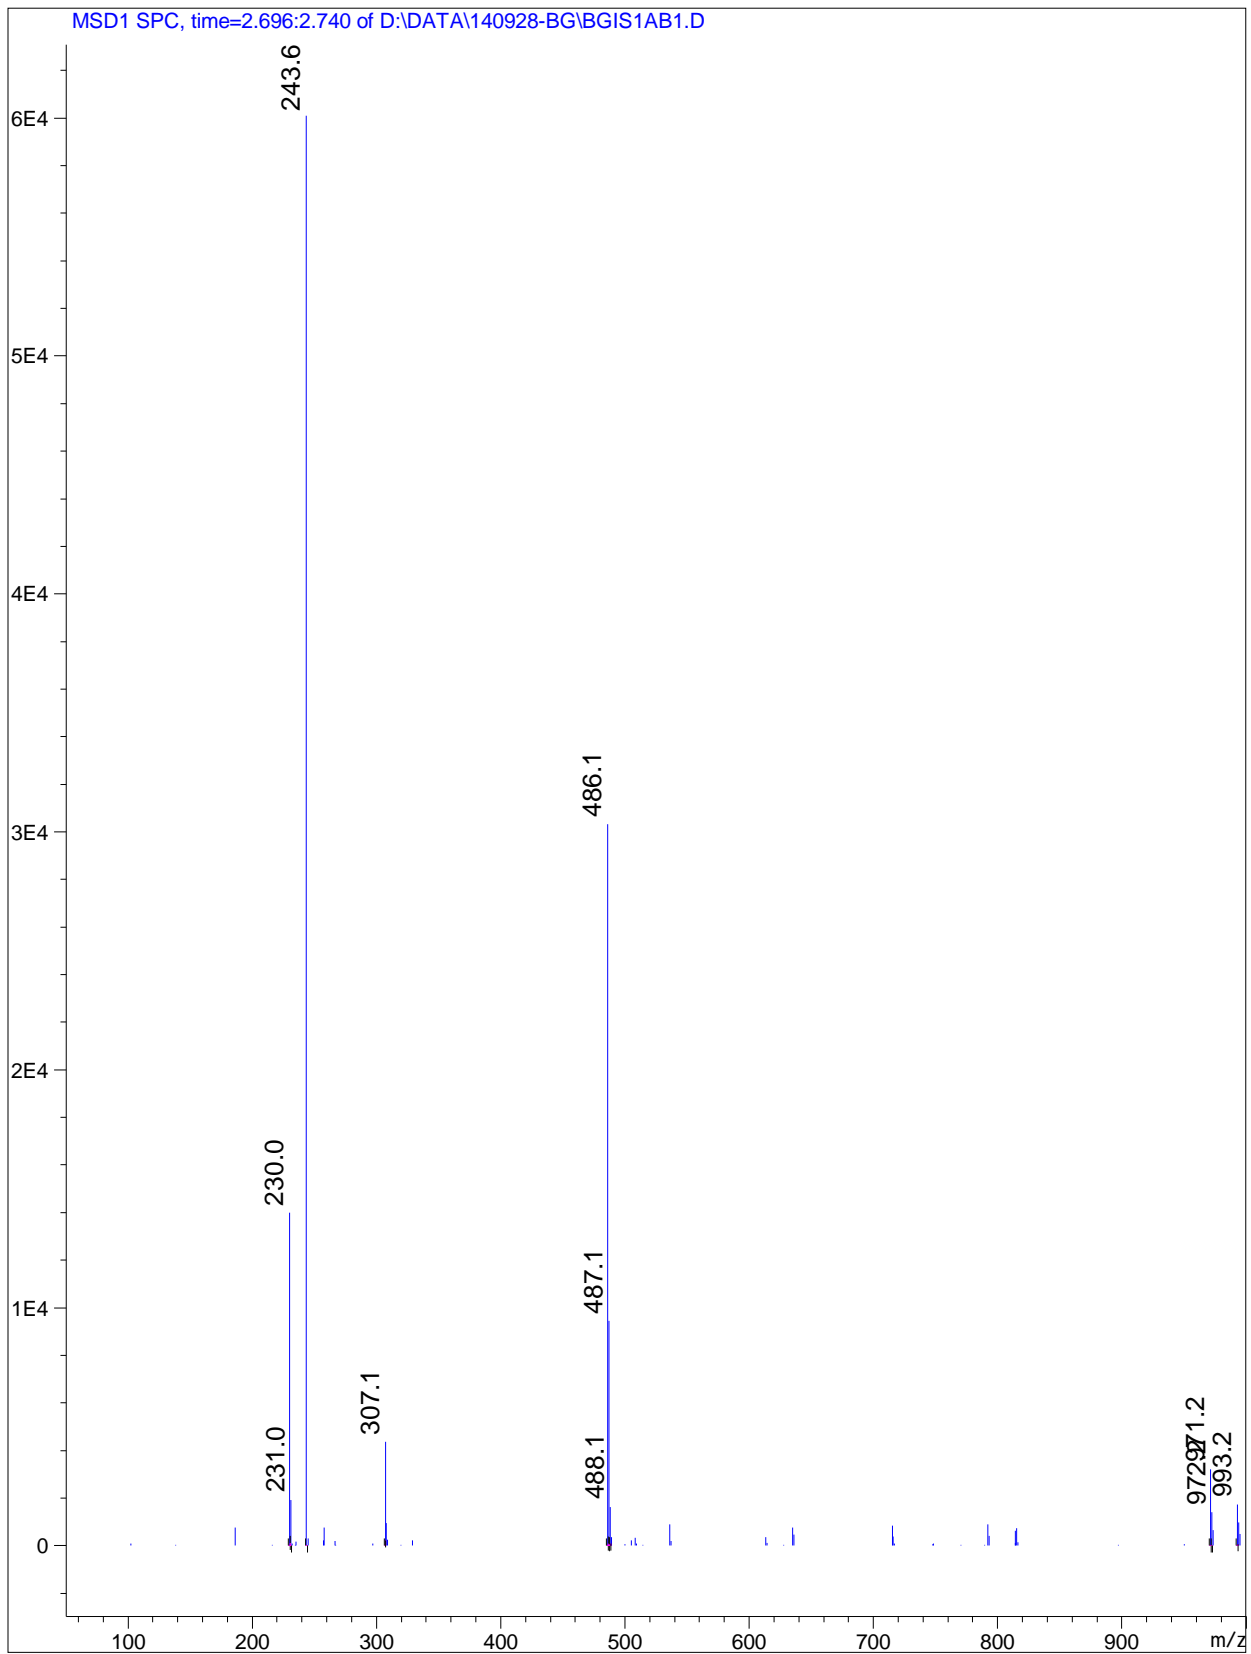

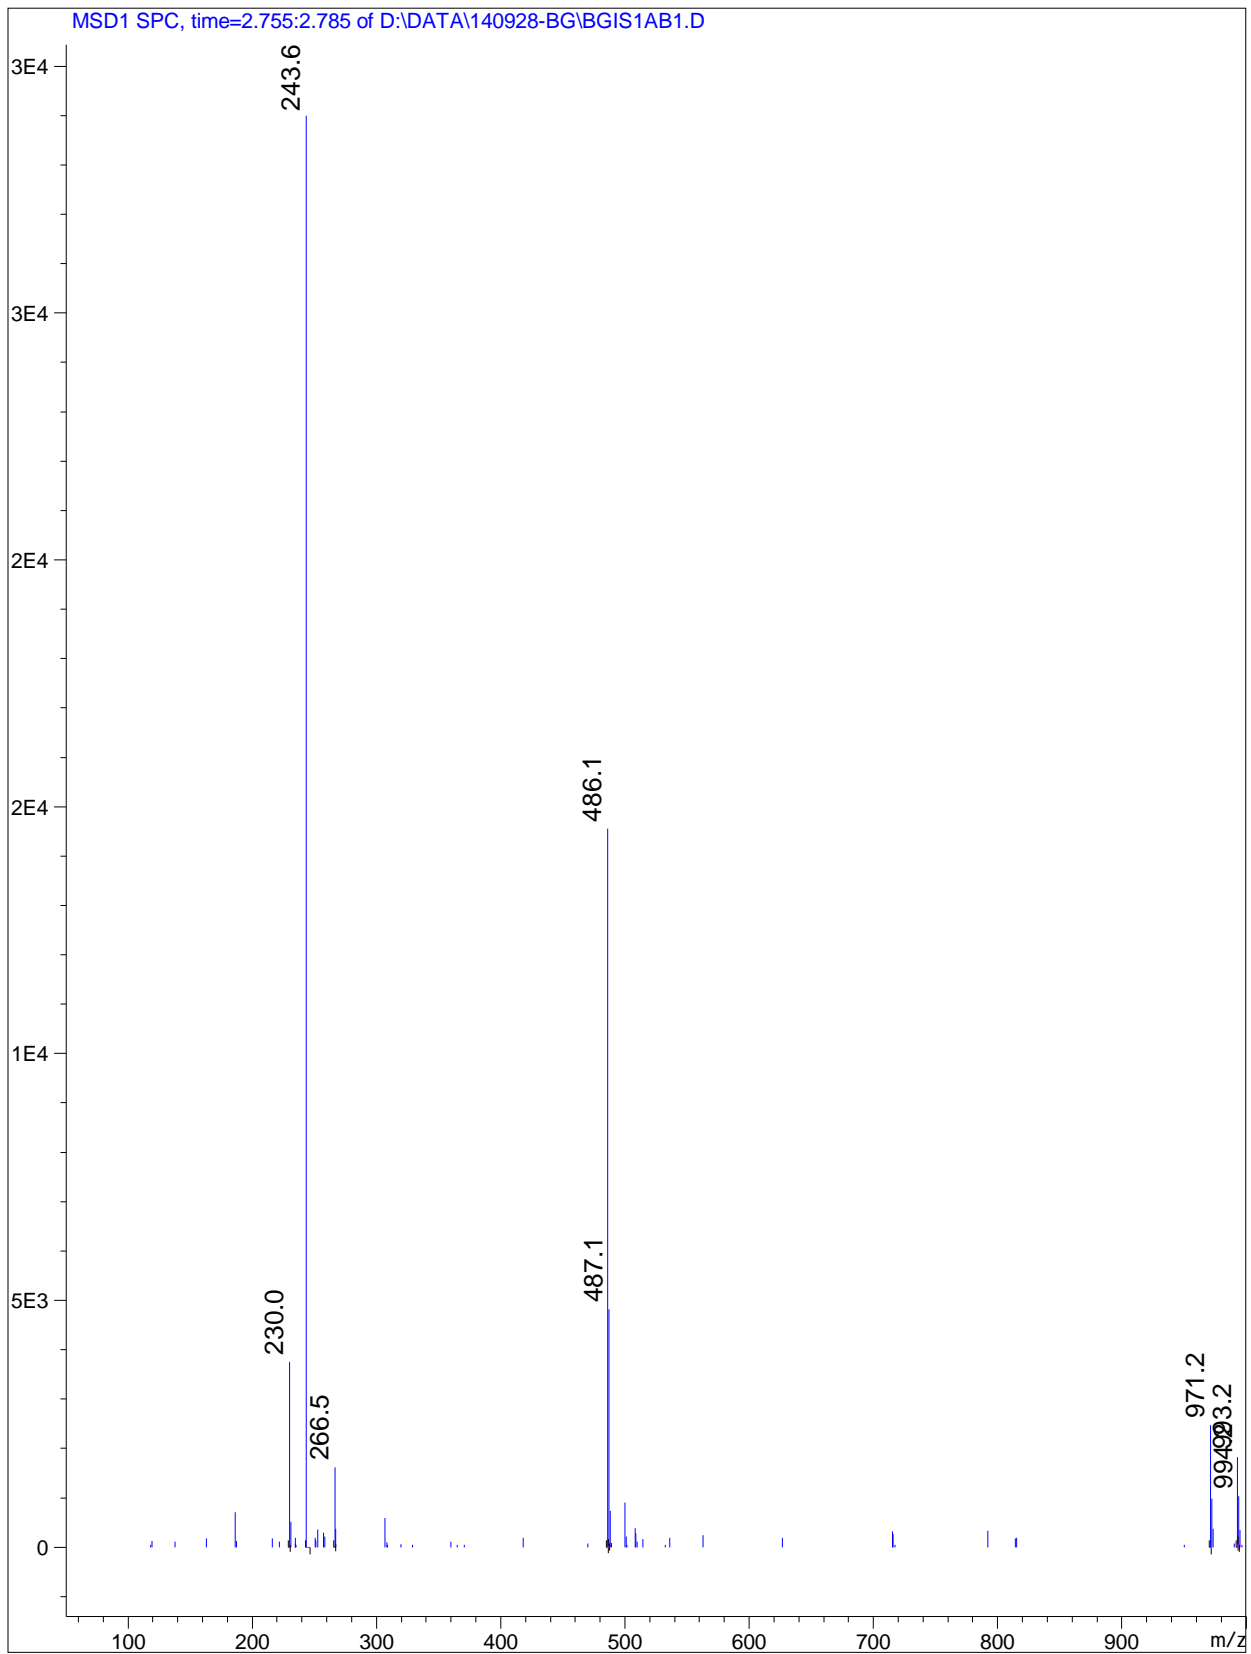

**SAMPLE INFORMATION**

|                                          |                        |                     |                     |
|------------------------------------------|------------------------|---------------------|---------------------|
| Sample Name:                             | DREX-012-SC45 CC-3199B | Acquired By:        | guest               |
| Sample Type:                             | Unknown                | Sample Set Name:    | DREX_12             |
| Vial:                                    | 1:E,8                  | Acq. Method Set:    | Ncptl_2             |
| Injection #:                             | 1                      | Processing Method:  | DREX_1              |
| Injection Volume:                        | 2.00 ul                | Channel Name:       | PDA Ch1 254nm@4.8nm |
| Run Time:                                | 10.0 Minutes           | Proc. Chnl. Descr.: | PDA Ch1 254nm@4.8nm |
| Date Acquired: 5/28/2014 3:39:36 PM MSD  |                        |                     |                     |
| Date Processed: 5/28/2014 4:19:03 PM MSD |                        |                     |                     |

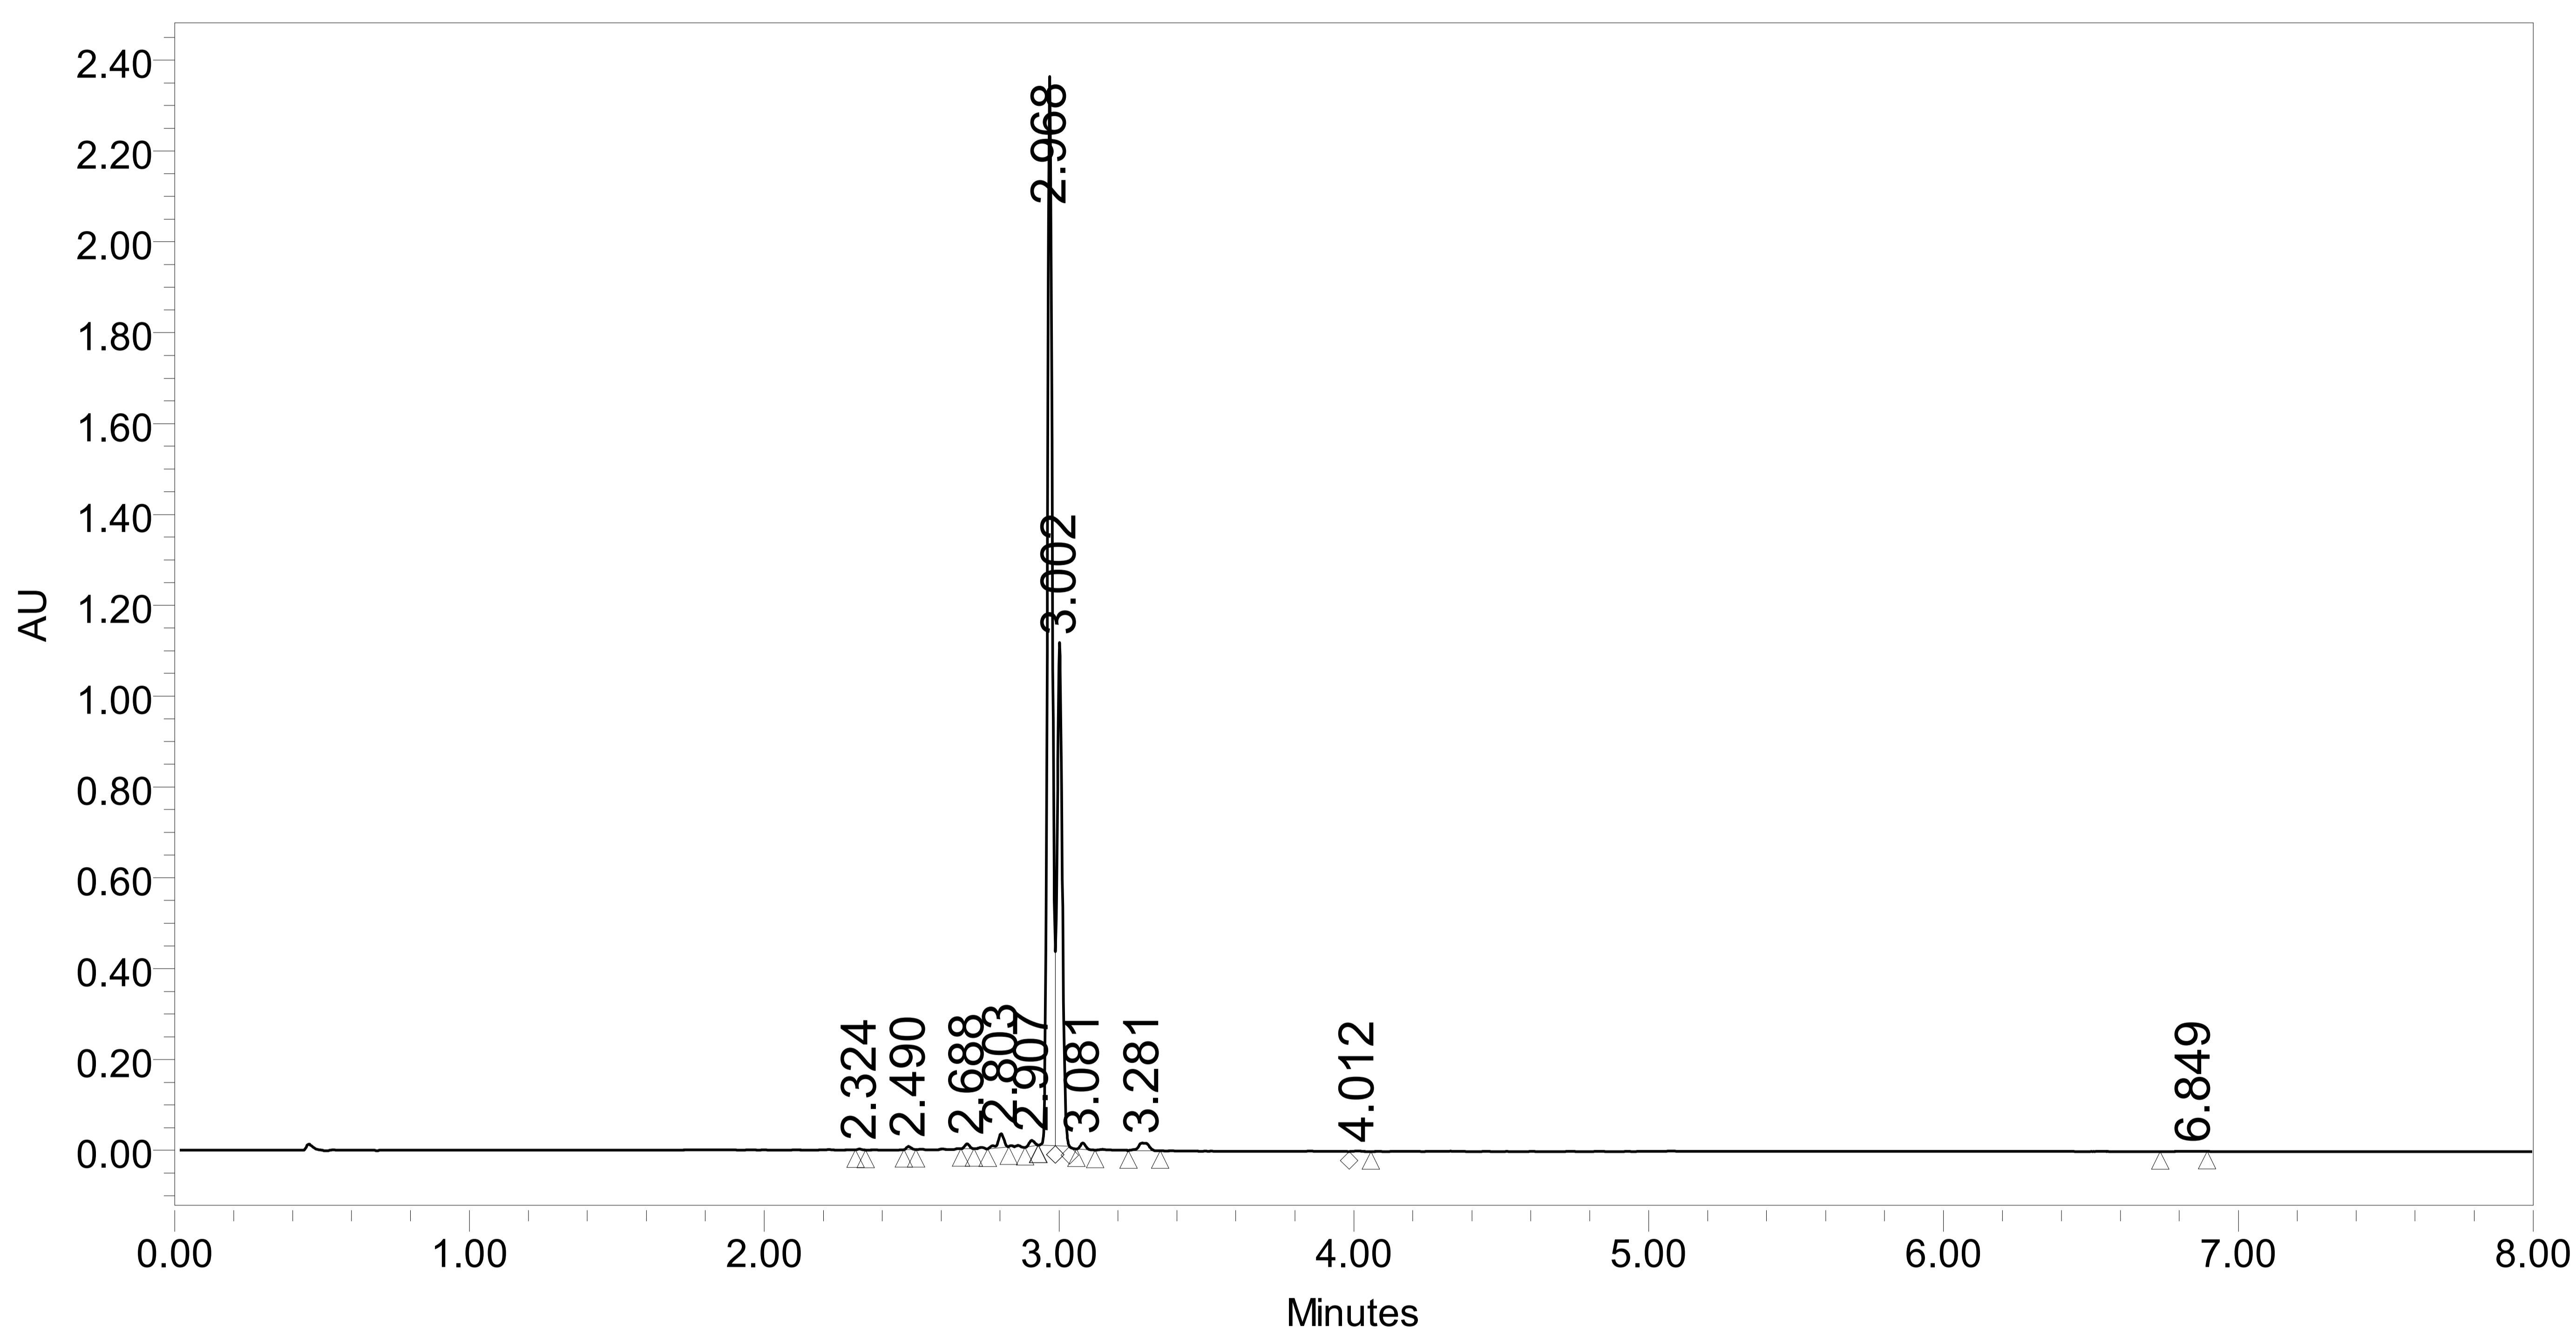

|   | RT    | Area    | % Area | Height  |
|---|-------|---------|--------|---------|
| 1 | 2.324 | 2368    | 0.06   | 2422    |
| 2 | 2.490 | 7805    | 0.18   | 6944    |
| 3 | 2.688 | 11557   | 0.27   | 10571   |
| 4 | 2.803 | 43719   | 1.02   | 30293   |
| 5 | 2.907 | 15479   | 0.36   | 12667   |
| 6 | 2.968 | 2802250 | 65.29  | 2353036 |
| 7 | 3.002 | 1347709 | 31.40  | 1107720 |
| 8 | 3.081 | 16764   | 0.39   | 14434   |

|    | RT    | Area  | % Area | Height |
|----|-------|-------|--------|--------|
| 9  | 3.281 | 41040 | 0.96   | 16666  |
| 10 | 4.012 | 2546  | 0.06   | 1623   |
| 11 | 6.849 | 734   | 0.02   | 255    |
